# Supplementary material for: Multicolor fluorescence fluctuation spectroscopy in living cells via spectral detection
Source: eLife. 2021 Sep 8;10:e69687. doi: 10.7554/eLife.69687 (PMC8545396; doi:10.7554/eLife.69687)
Supplement: Figure 1—source data 1. [file elife-69687-fig1-data1.xlsx]

## Sheet: Tabelle1
Panel B			Panel C				Panel E			Panel F
Rel.cross-correlation			SNR				Rel.cross-correlation			SNR
G+Y	Y-G		F(G)/F(Y)	G	Y		A+Ch2	Ch2-A		F(A)/F(Ch2)	A	Ch2
2.25e-30	0.73		0.0229	0.1794	3.0387		2.19e-17	0.853		0.4691	0.4964	0.5609
6.57e-17	0.66		0.2197	1.7679	2.641		2.14e-19	0.553		0.6401	0.6343	0.507
3.45e-24	0.71		0.5726	1.8257	1.524		4.06e-20	0.927		0.665	0.6182	0.5579
1.12e-23	0.495		0.7044	1.728	2.1013		0.124	0.658		0.0224	0.2862	0.8113
1.12e-16	0.669		0.0058	0.2426	3.0826		0.017	1.05		7.0662	0.8666	0.3225
1.91e-23	0.895		3.8103	1.8371	0.4679		0.0221	1.08		14.7595	0.7754	0.2337
0.108	0.599		0.4953	2.1179	2.0434		1.38e-29	0.509		0.3386	0.4952	0.5376
2.46e-23	0.772		6.9313	2.1581	0.2237		1.09e-17	0.822		5.2896	1.0427	0.2952
1.43e-23	0.589		0.2529	1.5611	2.4283		0.0197	0.774		3.6637	0.944	0.2715
9.49e-17	0.552		0.314	1.3827	2.2024		0.00144	0.603		0.4637	0.487	0.4756
0.00431	0.714		12.6937	2.0783	0.2223		1.93e-23	0.658		1.1856	0.6559	0.4625
1.25e-17	0.729		0.9465	2.3898	1.8212		0.0799	0.671		2.7072	0.8636	0.3741
0.00289	0.884		1.0037	2.0488	1.6839		0.0229	0.637		2.8035	0.8995	0.3733
0.0326	0.739		0.1042	0.8697	1.7805		1.54e-18	0.943		31.0641	0.9386	0.2176
0.047	0.977		2.5471	2.054	0.7002		0.0571	0.916		16.0411	0.8691	0.2329
7.14529e-29	0.718		0.3737	2.0563	2.4328		0.0408	1.01		0.2261	0.4349	0.8529
0.0687544	0.861		0.033	0.1698	3.9001		0.156	0.778		0.4293	0.7112	1.0854
1.44911e-28	0.789		7.2332	2.3728	0.4681		2.39e-16	0.51		1.0037	0.4835	0.35
4.21855e-24	0.77		0.5883	2.0999	1.9604		0.00766			0.3317	0.4586	0.5029
0.0280389	0.77		2.6613	2.0289	0.3743		0.0105			0.2865	0.5495	0.6292
6.49471e-24	0.66		0.5219	1.4826	1.303		1.33e-22			0.7587	0.5499	0.6598
0.16762	0.55		1.3926	2.3493	1.4358		0.25			0.2104	0.4285	0.6914
0.0159252			1.7263	2.269	1.3494		0.116			0.1173	0.3959	0.7237
0.0199			0.4841	1.6761	2.0363		8.13e-18			0.1578	0.4609	0.6867
3.95e-19			0.7885	1.9981	2.2624					0.2248	0.5336	0.9224
0.0445			1.3602	2.0248	1.6997					0.1538	0.4648	0.8707
1.5e-26			2.0447	2.015	0.8763					0.5939	0.5794	0.6731
3.42e-19			0.8137	2.2736	2.1706					0.5946	0.5081	0.5619
6.27e-26			11.8412	2.2914	0.2468
1.51e-31			1.2855	1.929	1.7649
1.02e-21			11.4429	2.4115	0.2956
0.00377			0.6109	1.7728	1.911
1.56e-28			2.477	2.1495	0.9143
0.000744			0.7535	2.0253	1.8198
			0.5543	1.923	2.1381
			1.0521	1.8133	1.3231
			1.0316	2.1418	1.7577
			18.8571	2.835	0.2515
			1.1953	2.2404	1.6662
			4.1061	2.4981	0.7218
			1.1213	2.7486	2.0634
			1.2676	2.7541	1.5262
			1.1619	2.3785	1.2455
			1.7693	2.3984	1.2494
