# Supplementary material for: Multicolor fluorescence fluctuation spectroscopy in living cells via spectral detection
Source: eLife. 2021 Sep 8;10:e69687. doi: 10.7554/eLife.69687 (PMC8545396; doi:10.7554/eLife.69687)
Supplement: Figure 2—source data 1. [file elife-69687-fig2-data1.xlsx]

## Sheet: Tabelle1
Panel A					Panel B
Diffusion time [s]					Normalized Brightness
HA-G/ mp-Y		HA-G + mp-Y			mp-G + mp-Y		mp-2xG + mp-Y		mp-G
HA	mp	HA	mp		G	Y	G	Y	G
0.0296	0.00872	0.0604	0.0106		1.16	1.11	1.5	1.21	1.01
0.0368	0.00635	0.0375	0.016		0.895	0.821	0.703	1.09	1.04
0.0216	0.00894	0.0261	0.0116		1.22	1.22	1.94	1.41	0.823
0.0396	0.00867	0.0251	0.00669		0.974	0.884	1.23	0.646	0.949
0.0369	0.00811	0.0317	0.00628		0.946	0.943	1.54	1.14	1.39
0.0356	0.00768	0.0303	0.00766		0.914	1.08	1.89	1.17	1.42
0.0313	0.0128	0.035	0.0132		0.918	0.906	1.62	1.08	1.12
0.0308	0.00941	0.0267	0.00584		0.968	1.03	2.54	1.45	1.42
0.0419	0.0109	0.0318	0.00901		0.732	0.737	1.94	0.979	1.45
0.043	0.0085	0.0263	0.00663		1.16	1.12	1.87	1.09	1.04
0.0493	0.0058	0.0467	0.0138		0.847	0.899	1.57	0.988	1.03
0.034	0.0083	0.044	0.0101		0.908	0.893	1.5	0.949	1.04
0.0381	0.0118	0.0376	0.00696		1.14	1.18	1.63	1.06	0.853
0.0249	0.00943	0.0366	0.00737		1.01	0.957	1.26	0.816	0.997
0.0333	0.00795	0.0316	0.00826		1.1	1.19	1.79	1.1	0.955
0.0446	0.0055	0.0257	0.00853		1.24	1.3	1.64	0.96	0.849
0.0529	0.00605	0.0357	0.00655		0.88	0.814	1.96	1.04	0.942
0.0293	0.008	0.035	0.0091		0.965	0.882	1.41	1	1.04
	0.00715	0.0227	0.00761		1.01	1.04	1.49	0.979	0.964
	0.00638	0.0254	0.0092				1.69	1.12	0.888
		0.0335	0.0106				1.8	1.1	0.749
									0.712
