# Supplementary material for: Multicolor fluorescence fluctuation spectroscopy in living cells via spectral detection
Source: eLife. 2021 Sep 8;10:e69687. doi: 10.7554/eLife.69687 (PMC8545396; doi:10.7554/eLife.69687)
Supplement: Figure 3—source data 1. [file elife-69687-fig3-data1.xlsx]

## Sheet: Tabelle1
Panel A										Panel B
Rel. Cross-correlation										Normalized Brightness
mp-G + mp-Y + mp-Ch2			mp-Ch2-G + mp-Y			mp-Y-Ch2-G				mp-G + mp-Y + mp-Ch2			mp-2x-G + mp-Y + mp-Ch2			mp-G
G,Y	G,Ch2	Y,Ch2	G,Y	G,Ch2	Y,Ch2	G,Y	G,Ch2	Y,Ch2		G	Y	Ch2	G	Y	Ch2	G
0.000603	7.17e-24	3.23e-30	2.97e-27	0.42634	1.87e-27	0.656078	0.480879	0.465076		1.05	1.16	1.09	1.55	1.12	1	0.973
2.56e-18	4.26e-06	0.114758	0.011122	0.510309	5.08e-21	0.751725	0.561318	0.505438		0.672	0.639	0.745	1.5	0.909	0.958	1.04
0.234882	0.085596	0.216043	1.11e-19	0.472166	0.033449	0.794456	0.605564	0.549266		1.15	1.06	1.14	1.41	1.01	0.958	0.934
1.92e-17	7.29e-23	2.4e-28	0.009087	0.388767	0.151282	0.913312	0.58328	0.554078		0.888	0.79	0.837	2.09	1.33	1.33	1.28
1.62e-20	2.12e-28	1.93e-17	0.052451	0.395436	0.0408	0.791067	0.431766	0.521896		0.801	0.674	0.802	1.58	1.12	1.04	1.21
0.022341	6.71e-21	0.042234	5.98e-18	0.359409	0.006611	0.867701	0.616937	0.600237		0.989	1.02	0.917	0.934	0.583	0.6	0.574
0	1.35e-17	0.032694	0.05498	0.555359	4.45e-23	0.62896	0.497443	0.522594		0.915	0.955	1.03	2.11	1.42	1.34	0.785
7.42e-23	2.66e-18	0.068044	0.001224	0.467663	0.004242	0.820836	0.558103	0.635729		1.13	1.21	1.09	2.13	1.42	1.34	1.07
7.19e-27	0.018519	8.17e-19	4.24e-33	0.422082	3.26e-20	0.54593	0.476086	0.458603		1.21	1.25	1.18	1.21	0.832	0.903	1.17
1.73e-28	1.21e-27	0.032802	8.61e-22	0.449571	2.55e-19	0.846	0.577	0.669		1.39	1.39	1.27	1.7	1.04	0.986	0.961
2.73e-22	1.33e-24	0.001351	3.43e-18	0.461122	0	0.882	0.598	0.662		0.954	0.944	0.927	1.19	0.851	0.874	1.18
0.014988	1.51e-18	8.41e-25	0.049371	0.384896	0.038481	0.953	0.602	0.587		0.831	0.841	0.93	1.26	0.838	0.677	1.01
2.76e-23	0	2.01e-23	0.07923	0.544964	0.030341	0.712	0.571	0.553		1.08	0.946	1.01	2.47	1.34	1.22	1.18
0.002729	2.01e-25	0.018633	0.048772	0.511666	-3e-14	0.602	0.439	0.535		1	1.13	1.11	1.73	1.15	1.08	1.12
0.058835	3.37e-32	0	0.111692	0.416507	5.93e-24	0.898	0.589	0.727		0.942	0.991	0.929	1.43	0.912	0.777	0.936
0.097685	0.081878	0.151476	0.115063	0.511292	0.199036	0.905	0.624	0.58		1.05	1.06	1.11	1.33	0.73	0.931	1.38
1.42e-26	0.030389	0.032309	0.002527	0.453879	0.128173	0.895	0.734	0.513		0.907	0.958	1.02	1.53	1.17	1.04	1.61
0.091062	8.15e-22	0	0.002715	0.414	4.68e-18					0.733	0.763	0.626	2.37	1.21	1.18	0.667
0.017654	1.2e-21	0.013686	0.07765	0.421538	0.068337					0.72	0.7	0.828	1.34	0.893	0.849	1.45
0.118439	0	0.134925	0.00849	0.384718	3.15e-29					0.886	0.744	0.982	1.2	0.723	0.789	1.2
0.068698	0.232742	2.08e-24								0.672	0.726	0.713	2.05	1.07	1.17	0.978
0.139618	0	8.77e-23								0.66	0.725	0.683	1.62	0.86	1.09	1.24
1.43e-26	0	0.146043								1.49	1.4	1.27	1.73	1.09	1.02	0.814
0.109247	0.028314	1.12e-20								1.12	1.11	1.15	2.66	1.33	1.42	1.37
0.328566	0.003056	0.300164								0.788	0.97	0.815	2.29	1.08	1.1	1.12
2.75e-25	3.83e-20	6.73e-24								1.23	1.17	1.16				0.978
6.88e-21	0.025057	0.000541								1.14	1.21	1.28				0.979
1.3e-28	0.002053	6.11e-13								1.61	1.46	1.36				1.05
