# Supplementary material for: Multicolor fluorescence fluctuation spectroscopy in living cells via spectral detection
Source: eLife. 2021 Sep 8;10:e69687. doi: 10.7554/eLife.69687 (PMC8545396; doi:10.7554/eLife.69687)
Supplement: Figure 4—source data 1. [file elife-69687-fig4-data1.xlsx]

## Sheet: Tabelle1
Panel G
Rel. Cross-correlation
mp-G + mp-Y + mp-A + mp-Ch2						mp-Ch2-G + mp-Y + mp-A						mp-Y-Ch2-G-A
G,Y	G,A	G,Ch2	Y,A	Y,Ch2	A,Ch2	G,Y	G,A	G,Ch2	Y,A	Y,Ch2	A,Ch2	G,Y	G,A	G,Ch2	Y,A	Y,Ch2	A,Ch2
0.104	0.0504	0	0.329	0.0292	0.111	0.0111	0.226	0.641	0.197	0	0.232	0.727	0.455	0.656	0.554	0.538	0.397
1.47e-18	0.0523	0.189	4.69e-21	0.0121	0.278	0.0606	1.27e-27	0.503	1.6e-17	0	0.0169	0.776	0.429	0.635	0.425	0.652	0.465
0	4.38e-30	0.134	4.43e-27	0.0719	0.317	0.14	0.102	0.727	0.208	7.34e-27	0.0321	0.795	0.391	0.639	0.46	0.553	0.627
7.65e-27	1.6e-23	0.101	0.0548	0.0377	0.12	0.102	0	0.518	3.67e-21	7.7e-17	0.00749	0.686	0.3	0.419	0.387	0.391	0.39
4.76e-26	0.00608	1.67e-20	0.00752	0.00358	0.129	0.015	0.147	0.475	4.47e-24	0.0957	0.0161	0.884	0.384	0.669	0.552	0.827	0.632
9.14e-25	6.4e-30	0	5.83e-24	0.0327	0.201	0.23	0.0586	0.609	0.0155	0.257	0.175	0.734	0.545	0.723	0.414	0.81	0.512
3.95e-16	0.00645	1.3e-22	0.0243	4.62e-17	0.012	0.0729	0.134	0.725	0.0278	0.12	0.0509	0.67	0.374	0.702	0.439	0.577	0.512
1.52e-18	0.0154	5.71e-30	1.8e-24	0.122	6.45e-19	0.136	5.44e-25	0.74	0.273	0.018	0.0951	0.865	0.498	0.665	0.491	0.604	0.505
2.21e-21	9.24e-22	5.04e-25	4.94e-17	0.087	3.29e-21	0.0305	6.22e-17	0.478	0.0867	4.74e-17	0.0407	0.763	0.507	0.486	0.542	0.666	0.583
0.0304	2.3e-19	0.00805	7.5e-15	0.0315	0.0433	1.1e-25	0.0179	0.464	0.317	3.14e-16	0.0978	0.833	0.452	0.599	0.418	0.594	0.742
0.0041	3.85e-16	0	2.24e-25	4.98e-16	0.107	7.22e-18	0.105	0.398	2.08e-19	2.07e-23	0.0948	0.843	0.424	0.689	0.374	0.593	0.428
2.56e-17	3.89e-15	3.73e-17	0.000336	4.65e-17	5.79e-19	0.0216	0.00294	0.541	3.71e-17	0.0447	0.0826	0.651	0.348	0.605	0.469	0.602	0.653
						2.54e-28	0	0.37	1.87e-20	1.27e-23	0.355	0.844	0.332	0.631	0.447	0.576	0.448
												0.862	0.4	0.649	0.466	0.614	0.49
												0.794	0.437	0.707	0.532	0.611	0.604
