# Supplementary material for: Multicolor fluorescence fluctuation spectroscopy in living cells via spectral detection
Source: eLife. 2021 Sep 8;10:e69687. doi: 10.7554/eLife.69687 (PMC8545396; doi:10.7554/eLife.69687)
Supplement: Figure 5—source data 1. [file elife-69687-fig5-data1.xlsx]

## Sheet: Tabelle1
Panel G																			Panel H
Rel. Cross-correlation																			D [um2/s]
1x-G + 1x-Y + 1x-A + 1x-Ch2						Ch2-G + Y-A						Y-Ch2-G-A							1x-G + 1x-Y + 1x-A + 1x-Ch2				Ch2-G + Y-A				Y-Ch2-G-A
G,Y	G,A	G,Ch2	Y,A	Y,Ch2	A,Ch2	G,Y	G,A	G,Ch2	Y,A	Y,Ch2	A,Ch2	G,Y	G,A	G,Ch2	Y,A	Y,Ch2	A,Ch2		G	Y	A	Ch2	G	Y	A	Ch2	G	Y	A	Ch2
0	0	0.042287	0	0	0	0	0	0.444669	0.214439	0	0	0.609893	0.432597	0.503276	0.38098	0.418847	0.342224		25.7	26.1	19.8	20.6	16.2	5.19	8.54	16.6	9.25	8.64	10.3	7.43
0	0	0	0	0	0	0	0	0.330275	0.132098	0	0	0.571467	0.385702	0.440617	0.401487	0.417923	0.268748		20.7	23.2	16.5	26.1	14.2	6.02	7.19	9.26	10.1	10	12.3	14
0	0	0.100555	0.112375	0	0	0	0	0.574779	0.445663	0	0	0.636408	0.44743	0.475547	0.373995	0.462034	0.370038		24.7	26.6	22.8	27.9	19	6.09	11.7	23.2	10.2	9.63	10.2	9.02
0	0	0.058478	0	0.07727	0	0	0	0.452972	0.343345	0.114114	0	0.670009	0.412031	0.490314	0.49189	0.443675	0.333767		26.8	25.3	21.1	27.3	22.5	9.18	11.3	16.7	8.85	7.64	9.63	11.4
0	0	0	0	0	0	0	0	0.515247	0.272616	0	0	0.517997	0.365771	0.233967	0.275204	0.40255	0.132854		26.1	25.8	20.2	13.6	18.2	13.1	12.4	16.8	9.91	10.1	8.93	4.78
0	0	0	0	0	0	0	0	0.479531	0.268072	0	0	0.575202	0.272914	0.485511	0.400038	0.393508	0.314493		31.5	29.1	37.3	45.5	27.4	10.3	15.4	21.6	10	12.2	12.2	9.5
0	0	0	0	0	0	0	0	0.376806	0.169687	0	0	0.580819	0.290686	0.502247	0.379103	0.35296	0.291098		17.8	17.4	13.4	10.6	22.9	9.16	10.3	14.3	10	11.5	12.2	9.27
0	0	0	0	0	0	0	0	0.60635	0.596222	0	0	0.590733	0.395982	0.414429	0.42283	0.399553	0.355405		27.4	31.4	25.8	32.7	18.9	10.2	12.7	15.9	8.16	8.13	8.93	9.25
0	0	0	0	0.058208	0	0	0	0.497209	0.323326	0	0	0.603457	0.44815	0.342103	0.341562	0.484438	0.263395		24.3	22.1	15.1	22.5	21.9	8.85	12	18.1	8.34	8.62	8.72	8.21
0	0	0	0	0	0	0	0	0.501506	0.338484	0	0	0.553684	0.302399	0.432975	0.367885	0.335121	0.412471		24.1	24.1	18.4	24.7	18.9	7.86	9.76	19.8	10.2	10.1	12.6	12.8
0	0	0	0	0.136584	0	0	0	0.620712	0.402376	0	0	0.597114	0.344306	0.424597	0.461157	0.379352	0.18687		22.6	21.2	8.85	11.6	26.1	6.64	22.7	38.1	10.1	11.1	11.8	11.5
0.080743	0	0	0	0	0	0	0	0.201809	0.158584	0	0	0.493686	0.295806	0.429334	0.407503	0.337506	0.528779		21.4	19.1	19.4	30.2	14.1	4.49	9.3	52.3	8.59	9.49	9.76	9.03
0	0	0	0	0	0	0	0	0.394036	0.326442	0	0	0.638053	0.345048	0.558069	0.481414	0.419936	0.332865		26.7	23	19.1	15.9	15.4	5.38	7.19	15.9	13.9	13.9	17.6	19.3
0	0	0.161723	0	0	0	0	0.055498	0.438958	0.325786	0	0	0.593701	0.449323	0.50322	0.403523	0.492762	0.440333		30.4	29.5	21.3	18.1	19.7	8.27	11.2	21.1	14.1	15	17.3	19
0	0	0.153219	0	0	0	0	0	0.395997	0.300167	0.163019	0	0.60968	0.350662	0.494905	0.452061	0.342964	0.199731		26.3	26.9	22.4	53.6	20	6.99	10.1	11.4	10.5	11.9	11.4	10.7
0	0	0	0	0	0	0.021335	0	0.404958	0.249739	0	0	0.690345	0.336962	0.493428	0.498835	0.721908	0.3888		29.9	23.6	22	30.4	14.5	5.45	8.03	20.6	11.7	12.9	16.7	20.5
0	0	0.103782	0	0	0.030992	0	0	0.517432	0.393736	0	0	0.577626	0.33828	0.417463	0.307332	0.408511	0.111375		24.7	26.4	18	15.4	21.7	7.49	10.4	15.5	15.3	15.3	18	20.6
0	0	0.036048	0	0	0	0	0.158992	0.391382	0.302162	0	0	0.691552	0.408929	0.517855	0.456823	0.480246	0.271374		28.8	26.7	21.7	26.9	17.3	5.88	6.17	5.44	14.5	15.2	15.6	12.3
0	0	0	0	0	0	0	0	0.43783	0.223019	0	0	0.578166	0.338616	0.451628	0.433212	0.465228	0.258765		27.5	30.8	14.3	17.1	21.2	8.11	16.6	42.2	16.3	16.3	16.7	10.8
0	0	0	0.152057	0	0	0	0	0.413625	0.21619	0	0	0.563597	0.38138	0.440986	0.448939	0.445563	0.42768		30.2	39.2	16.4	19.3	18.8	8.84	11.3	16.1	14	13.5	15.4	22
0	0	0	0	0	0	0	0	0.545266	0.283051	0	0								25.9	28.5	19.4	20.7	19	6.24	7.94	17
						0	0.019019	0.416616	0.266096	0	0												19.5	9.66	8.79	15.8
						0	0.090782	0.539602	0.391639	0	0												18.3	8.6	11.4	16.3
