# Supplementary material for: Multicolor fluorescence fluctuation spectroscopy in living cells via spectral detection
Source: eLife. 2021 Sep 8;10:e69687. doi: 10.7554/eLife.69687 (PMC8545396; doi:10.7554/eLife.69687)
Supplement: Figure 6—source data 1. [file elife-69687-fig6-data1.xlsx]

## Sheet: Tabelle1
Panel D										Panel E													Panel F
Rel. Cross-correlation										Normalized Brightness													D [um2/s]
1x-G + 1x-Y + 1x-Ch2			Y-Ch2-G			PA-Y + PB1-G + PB2-Ch2				1x-G + 1x-Y + 1x-Ch2			2x-G + 1x-Y + 1x-Ch2			2x-G + 2x-Y + 2x-Ch2			PA-Y + PB1-G + PB2-Ch2
G,Y	G,Ch2	Y,Ch2	G,Y	G,Ch2	Y,Ch2	G,Y	G,Ch2	Y,Ch2		G	Y	Ch2	G	Y	Ch2	G	Y	Ch2	G	Y	Ch2		G	Y	Ch2
0	0	0	0.531705	0.489456	0.434526	1.03904	0.485329	0.554136		0.758619	0.912692	0.938279	2.29	1.12762	1.13	1.39368	1.67671	1.79655	1.96047	1.54072	2.00613		1.43	2.71	1.91
0	0	0	0.635343	0.482587	0.569454	1.12841	0.695055	0.227456		1.18069	0.913429	1.11648	1.67	0.935322	1.04	2.58992	2.48121	2.22073	1.85136	1.35759	1.65165		1.47	3.63	2.96
0	0	0.049239	0.783534	0.466907	0.562724	0.871438	0.470779	0.159603		1.13834	1.33338	1.10225	1.89	1.17079	1.39	2.61087	2.60228	2.39149	2.25007	1.61321	1.67318		1.07	1.93	1.95
0	0	0	0.594472	0.509977	0.552242	1.16032	0.644109	0.496572		0.842941	0.856419	1.0395	2	1.09215	1.06	1.96484	1.73089	1.58835	2.13118	1.95616	1.90646		1.18	1.42	2.11
0	0	0	0.679303	0.527657	0.660724	1.20815	0.560707	0.370352		1.13123	0.854337	0.997576	1.15	0.833091	0.892	1.65184	1.68337	1.68512	3.43993	2.61277	2.80405		1.18	1.77	1.88
0	0	0	0.630537	0.355212	0.50913	1.17537	0.574274	0.359618		0.592999	0.962642	1.01008	1.3	0.806448	0.983	1.83212	1.73371	1.65873	1.87387	1.29886	1.7142		1.49	3	2.13
0	0	0	0.677928	0.507654	0.600661	0.983884	0.54193	0.639553		1.10104	1.1208	0.985097	2.04	1.1406	1.19	1.83251	1.50383	1.35715	0.827929	0.858716	1.02785		1.85	1.98	2.73
0	0	0.080855	0.608068	0.443251	0.519131	1.05492	0.557861	0.454522		1.30313	1.16425	0.95967	1.44	0.750091	0.906	1.65063	1.64746	1.65696	1.84508	1.51534	2.21398		1.51	1.83	2.03
0	0	0	0.50198	0.428978	0.499285	0.940727	0.384297	0.436989		1.09136	1.15078	0.930491	1.46	1.13454	1.11	1.75056	1.77772	1.67865	1.58119	1.53249	1.63082		1.38	1.25	1.89
0	0	0	0.610955	0.414597	0.580114	1.0251	0.675801	0.469119		0.576941	1.00694	0.877824	1.43	0.802917	0.954	2.32299	2.00538	1.74144	2.75206	2.06082	2.91988		1.85	2.78	2.08
0	0	0	0.658629	0.507228	0.583245	1.27951	0.552995	0.359628		0.995655	0.610951	0.694356	1.33	0.87752	0.983	1.33512	1.35656	1.26616	1.85328	1.34295	1.81639		1.31	3.12	2.92
0	0	0	0.633956	0.344453	0.417318	0.708272	0.312627	0.387253		1.28705	1.1134	1.3484	1.38	0.884569	0.978	1.93117	1.86153	1.77771	2.45749	2.59315	2.55721		1.79	2.05	2.31
0	0	0	0.634549	0.525636	0.48903	0.833088	0.437009	0.324129		1.09037	0.985102	1.10878	1.45341	0.826115	0.864179	1.46396	1.50998	1.43706	2.00218	1.81923	1.82722		1.66	2.03	3.09
0	0	0	0.667513	0.475943	0.534256	1.04431	0.452331	0.215034		0.86827	0.878552	0.889404	1.60238	1.08406	1.09343	1.20092	1.22955	1.12892	2.04187	1.44683	2.07699		1.4	2.68	2.79
0	0	0.067618	0.639552	0.510194	0.556123	1.02187	0.343966	0.224626		0.839228	0.903901	0.929277	1.25321	0.771039	0.839506	1.82457	1.88	1.8	1.88418	1.33102	1.68373		1.36	2.42	2.69
0	0	0	0.544339	0.452216	0.457613	0.769623	0.575523	0.669067		0.84523	0.794193	0.868631	1.83168	1.05745	1.11971	1.7337	1.78769	1.50779	2.42298	1.4181	2.20767		2.04	3.64	2.97
0	0	0.033277	0.621193	0.48766	0.51408	0.986783	0.688676	0.276298		0.970094	0.913358	0.965271	1.06054	0.667225	0.654985	1.35845	1.55091	1.44067	1.32693	1.0727	1.32818		1.5	3.41	2.46
0	0	0.168481	0.495929	0.422747	0.366509	0.798842	0.315485	0.199046		1.14151	1.09155	1.04849	1.57971	0.854427	0.908987	1.2388	1.44245	1.34777	1.82999	1.56351	1.68775		2.41	3.35	4.12
0	0	0.03309	0.557637	0.401164	0.413275	0.64539	0.294442	0.294652		0.963935	0.992384	1.01403	2.05485	1.19771	1.05933	1.94113	2.08559	1.78212	1.09823	1.08634	1.26264		2.36	3.34	3.13
0	0	0.022552	0.545475	0.391346	0.384688	0.855137	0.341385	0.460099		1.0528	1.03949	0.848106	1.81652	1.06214	1.02268	1.44572	1.52653	1.31379	2.1184	1.71004	2.23698		3.03	3.57	3.21
0	0	0	0.699434	0.538301	0.576563	0.559945	0.015948	0.03175		1.066	1.07645	1.06852	1.33946	0.827005	0.99629	1.65969	1.97678	1.47876	1.52547	1.71336	1.59131		1.25	1.48	2.33
0	0	0	0.696118	0.427513	0.519192	1.00356	0.62736	0.386654		1.10906	1.08333	1.03299	1.56475	0.971538	1.12471	1.51699	1.76897	1.66459	1.54515	1.21924	1.52863		1.9	2.06	3.03
0	0	0.074321	0.680449	0.300459	0.371277	1.08205	0.406017	0.146455		1.02222	1.09094	1.07649	1.51355	1.10424	0.951918	1.62088	1.91572	1.84241	1.64698	1.14124	1.62397		1.29	4.37	2.22
0	0	0	0.674495	0.615881	0.471984	0.822655	0.459763	0.474048		1.03129	1.15076	1.15001	1.38618	0.824795	0.921448	1.42378	1.51873	1.16009	2.32238	2.23452	1.95941		1.53	1.39	2.37
0	0	0	0.656603	0.547191	0.517655	0.89373	0.306665	0.236522		1.18543	1.21736	1.42021	1.76354	0.997378	1.03725	2.16931	1.91956	1.95703	1.56404	1.33536	1.42484		1.75	2.43	3.1
0	0.042287	0	0.634289	0.384576	0.444663	0.652312	0.312985	0.374005		1.17486	1.01784	0.994724	2.33793	1.25131	1.32122	1.9682	1.89017	1.63553	1.70381	1.58817	1.30599		1.93	2.01	2.76
0	0	0	0.546738	0.395509	0.429765	0.653236	0.277957	0.214496		0.614533	0.635111	0.897086	2.54379	1.46149	1.28271	2.34596	2.22084	2.0137	2.75264	2.40141	1.57363		0.66	0.94	0.749
0	0.100555	0	0.682806	0.517732	0.516341	0.768383	0.379399	0.38802		0.891117	0.906646	0.889667	2.38726	1.32558	1.17722	1.55047	1.72053	1.56879	1.2921	1.30137	1.24464		2.72	3.15	3.98
0	0	0.000952	0.80382	0.534703	0.587432	0.766663	0.512699	0.689354		0.92762	0.972388	0.9636	1.61695	0.951944	0.956779	1.193	1.11666	1.16266	1.16848	1.42632	1.13535		2.91	2.53	3.69
0	0	0	0.632517	0.487353	0.523577	0.970586	0.618014	0.355729		1.183	1.1777	1.15376	1.75696	0.994441	1.09438	1.6451	1.44675	1.47748	1.14469	0.975036	1.07076		1.92	3	2.88
0	0	0	0.759991	0.520276	0.58594	0.886263	0.304908	0.225904		1.15406	1.11251	1.2863	1.40237	0.74517	0.902934	1.91033	1.91528	1.53132	1.83013	1.27528	1.81831		3.03	4.72	4.67
0	0	0	0.705467	0.305878	0.481581	0.698005	0.395293	0.503946		1.22171	1.17084	0.798214	2.05334	1.25876	1.28707	1.42782	1.33234	1.18163	1.98289	2.26681	1.74099		2.32	2.31	3.04
0	0	0	0.686639	0.43578	0.483028	0.831757	0.370518	0.189742		1.00765	1.02041	0.591853	1.03566	0.691004	0.762856	1.58797	1.81014	1.81479	2.0612	1.59538	1.54472		1.08	1.99	1.57
0	0	0	0.598305	0.616274	0.558466	0.788962	0.43458	0.379476		1.02174	1.08308	1.04483	1.80449	1.04227	1.09126	2.04775	1.96191	1.72164	1.74465	1.56192	1.35443		1.59	1.89	2
0	0.019501	0	0.539859	0.563	0.509086	0.828582	0.56056	0.348391		0.910741	0.903891	0.809375				1.58024	1.52566	1.408	1.81736	1.48069	1.54184		1.34	2.3	2.31
0	0	0	0.679447	0.499801	0.495362	0.945196	0.589623	0.441924		1.11241	1.18062	0.862777				2.58361	2.59154	2.11346	1.88224	1.46856	1.38905		2.31	2.92	2.96
0	0	0.058208	0.665794	0.600495	0.739286	0.85789	0.636104	0.390588		1.1775	1.1501	1.24157				1.55621	1.54436	1.35841	1.62218	1.2641	1.69295		2.98	4.91	2.46
0	0	0	0.790115	0.684607	0.73023	0.624131	0.449279	0.458075		0.868605	0.839986	1.08094				1.66961	1.62566	1.49187	1.07889	1.08884	0.98253		1.84	2.49	2.59
0	0	0.136584	0.689452	0.423444	0.674394	0.874348	0.525992	0.446148		0.549018	0.611527	0.965095				1.81052	1.95771	1.54797	1.71428	1.68698	1.69176		1.28	1.39	2.05
0.080743	0	0	0.607208	0.679403	0.615032	1.22989	0.797335	0.373349		0.927671	0.888332	0.942877							1.3755	1.04823	1.88266		1.88	3.02	1.87
0	0	0	0.859521	0.724302	0.606832	0.882519	0.397428	0.531067		0.806203	0.792272	0.746137							1.37742	1.43212	1.29273		2.36	2.63	3.36
0	0	0.084527	0.647254	0.482231	0.671398	1.20169	0.461332	0.291506		0.93514	0.821504	0.815049							1.22236	0.956886	1.33253		1.73	4.02	3.2
0.077206	0	0	0.477546	0.367245	0.576131	1.0562	0.515376	0.368859		0.977361	0.953495	0.694144							2.80541	2.04565	2.69132		1.51	1.97	2.11
0	0	0.065621	0.964939	0.728875	0.891658	0.957786	0.343751	0.344075		1	1.03236	1.02869							2.32073	1.88998	2.25454		1.19	1.56	1.93
0	0	0.098639	0.804314	0.291781	0.529026	0.966705	0.341663	0.337153		1.09576	1.14454	1.06638							1.76942	1.52214	1.72992		1.18	2.24	1.91
0	0	0.171369	0.534936	0.296659	0.261597	0.896862	0.407792	0.552835		1.08743	1	1							2.35298	2.38753	2.50347		2.15	2.65	2.7
0	0	0.040629				0.890554	0.311097	0.401594		1.42203	1.48856	1.25801							2.29964	1.99286	2.10749		2.08	2.96	2.63
0	0	0				0.893828	0.57447	0.657892		1.33064	1.3561	1.43336							2.15542	2.14337	2.21677		1.01	1.18	1.74
0	0	0				1.12391	0.515353	0.409374		1.3232	1.34346	1.30004							1.5758	1.28187	1.57683		1.69	2.57	2.39
0	0	0				1.3255	0.667805	0.475452		1.01384	1.02944	1.02271							1.06328	0.795567	1.08764		1.15	1.53	1.99
0	0	0				0.853405	0.563798	0.565076		0.970213	1.01213	1.04865							2.32629	2.20219	2.12814		2.05	2.52	2.52
0	0	0				0.837844	0.412637	0.42869		1.013	0.94654	0.976022							1.27234	1.28808	1.51334		1.57	1.72	2.22
0	0	0				0.853413	0.376091	0.478766		0.812073	0.767697	0.892529							2.05487	2.15154	1.80406		1.28	1.48	2.24
0	0	0								1.17291	1.24482	1.08701
										0.689278	0.701486	0.747286
										0.818208	0.727563	0.799094
										0.858762	0.958033	0.842753
										0.892371	0.815489	0.954924
										0.997243	1.04975	1.05358
										0.78841	0.817602	0.773587
										1.27083	1.17227	1.18802
										1.37965	1.41372	1.31379
