# Supplementary material for: Multicolor fluorescence fluctuation spectroscopy in living cells via spectral detection
Source: eLife. 2021 Sep 8;10:e69687. doi: 10.7554/eLife.69687 (PMC8545396; doi:10.7554/eLife.69687)
Supplement: Figure 7—source data 1. [file elife-69687-fig7-data1.xlsx]

## Sheet: Tabelle1
Panel C
Rel.3C.
neg.	polym.
0.0374982	0.231372
-0.261291	0.432825
1.13093	0.65223
0.829748	-0.156775
0.0618322	0.576436
0.13623	-0.211426
0.0769911	0.307166
-0.319134	0.114888
0.231372	0.470723
0.0951418	0.253313
-0.120673	0.337085
0.0307166	0.881607
0.72603	0.50463
0.319134	0.15478
1.40618	0.229378
-0.329107	0.211426
0.546517	0.359026
-0.650235	0.592392
0.791851	1.26457
0.23935	0.227383
-0.227383	0.941445
0.116683	0.337085
0.0584414	-0.0154182
-0.169939	-0.363015
-0.144009	0.518593
0.0261291	0.275253
0.14002	0.0474712
-0.478701	0.245334
-0.506625	0.999288
-0.0343069	0.610344
0.0957402	0.45676
-0.0289215	-0.24334
0.046075	0.269269
-0.196666	0.442798
0.157373	0.33908
-0.0947429	0.370993
0.84371	0.0741986
-0.72603	1.39621
-0.927483	0.887591
-0.368999	0.0396923
0.00186893	0.355036
-0.558484	0.168543
-0.815786	0.426842
0.0791851	0.877618
0.0616327	0.333096
0.552501	0.881607
-0.662203	0.498647
-1.67944	0.207437
-0.349053	0.40889
	1.23465
	0.422852
	0.797835
	0.975353
