# Supplementary figures and images for: Multicolor fluorescence fluctuation spectroscopy in living cells via spectral detection
Source: eLife journal article supplement (doi:10.7554/elife.69687), 2021-09-08

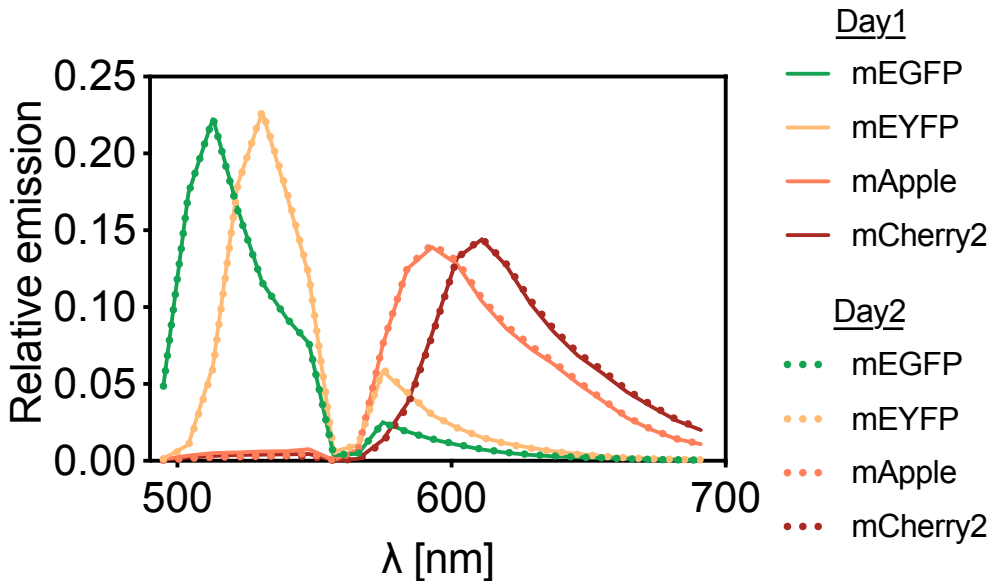

Supplement: supp [file elife-69687-supp-v1.zip]

- mp-G + mp-Y + mp-A + mp-Ch2
- mp-Ch2-G + mp-Y + mp-A
- △ mp-Y-Ch2-G-A

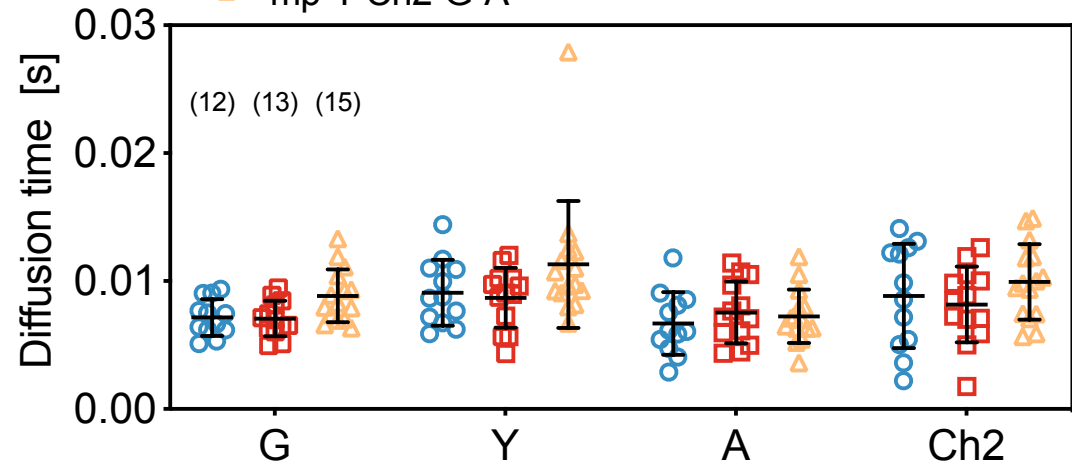

Supplement: supp [file elife-69687-supp-v1.zip]

**A**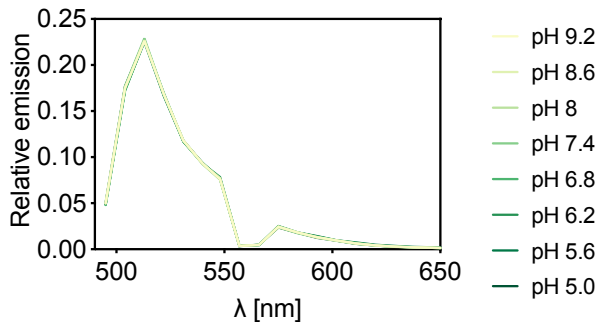**B**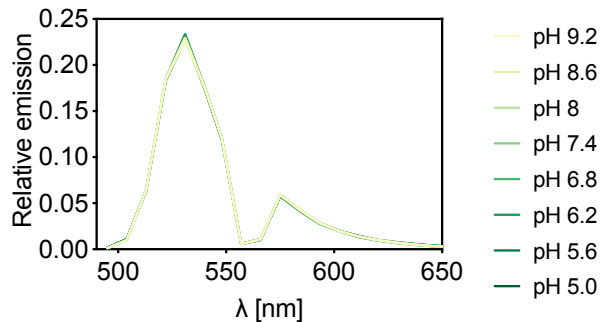**C**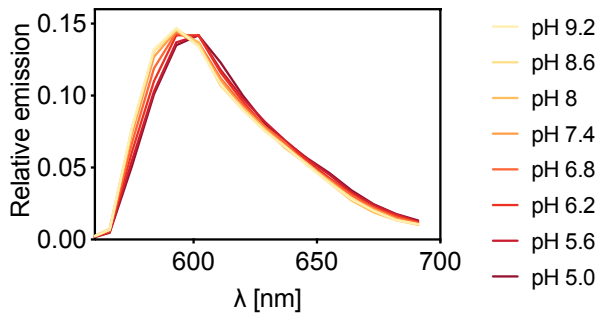**D**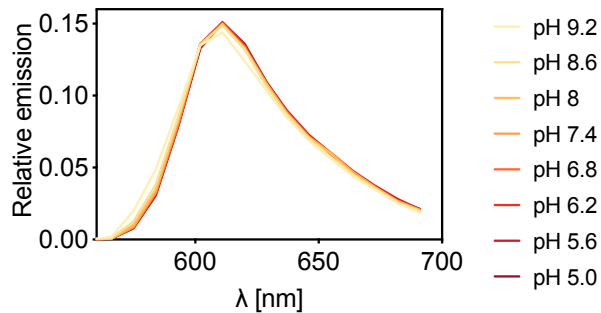

Supplement: supp [file elife-69687-supp-v1.zip]

**A**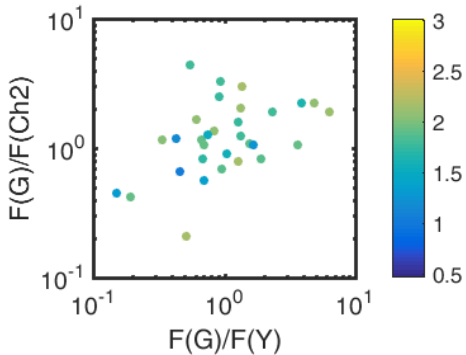**B**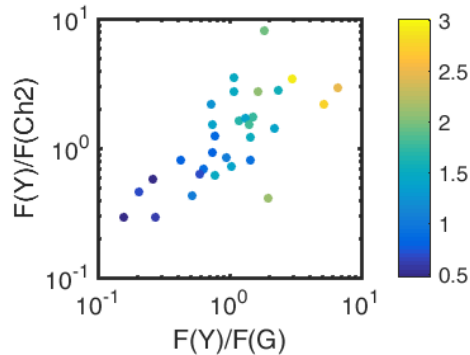**C**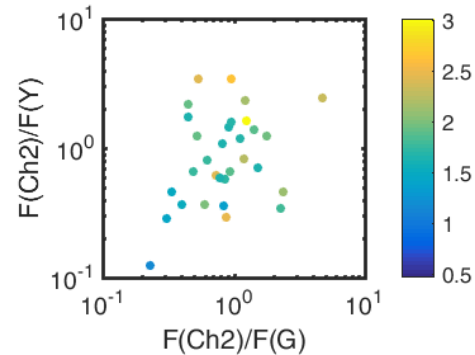

Supplement: supp [file elife-69687-supp-v1.zip]

**A**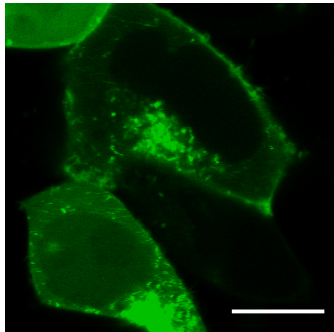**B**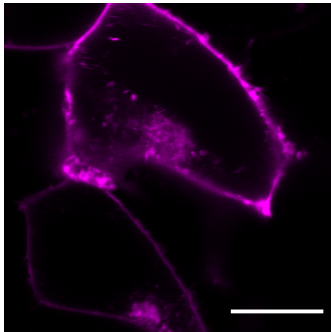**C**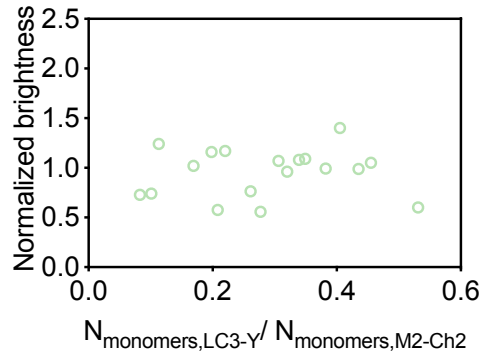

Supplement: supp [file elife-69687-supp-v1.zip]

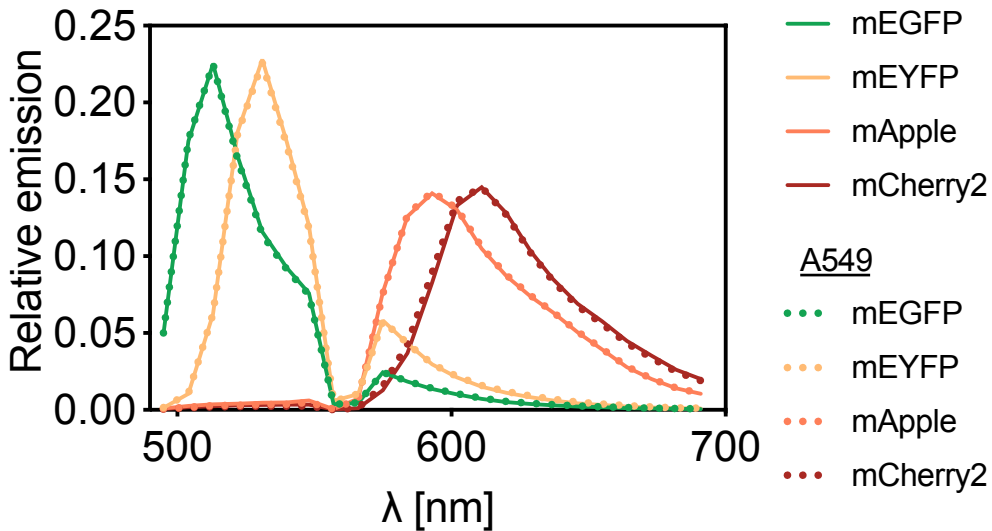

Supplement: supp [file elife-69687-supp-v1.zip]

- mp-G + mp-Y
- mp-2x-G + mp-Y
- △ HA-G + mp-Y

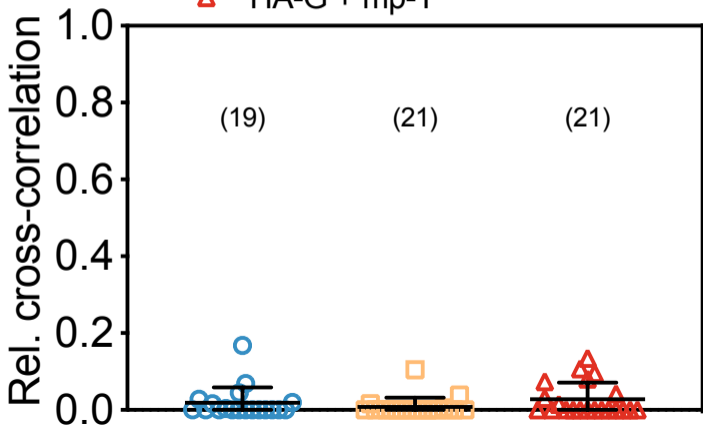

Supplement: supp [file elife-69687-supp-v1.zip]

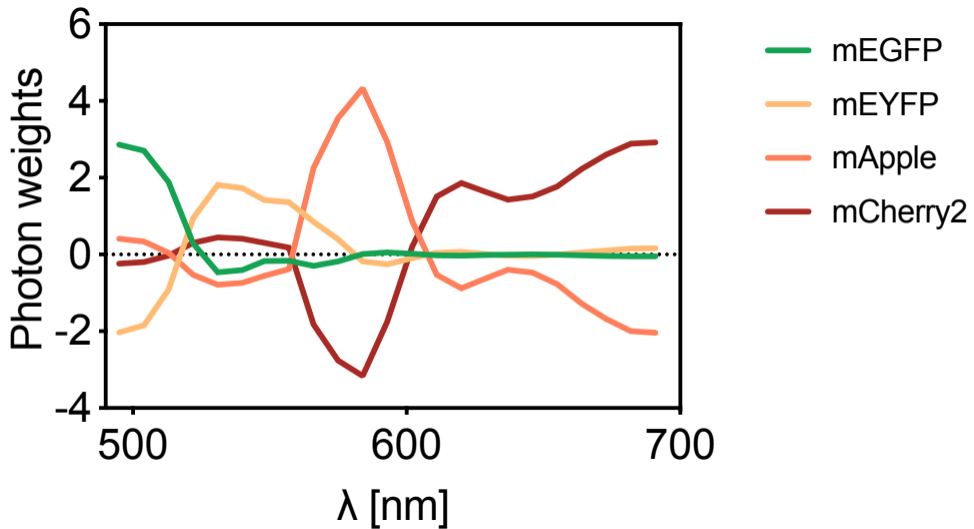

Supplement: supp [file elife-69687-supp-v1.zip]

**A**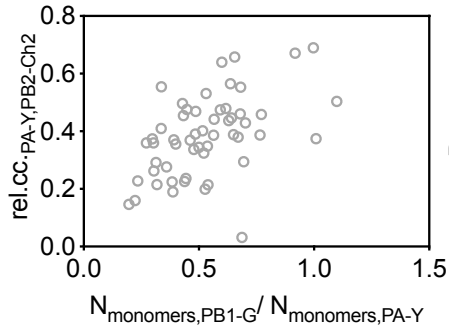**B**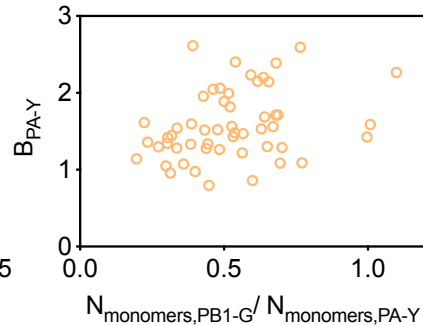**C**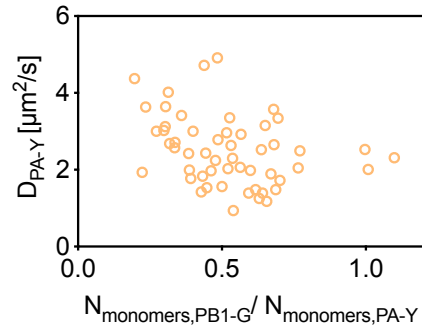

Supplement: supp [file elife-69687-supp-v1.zip]

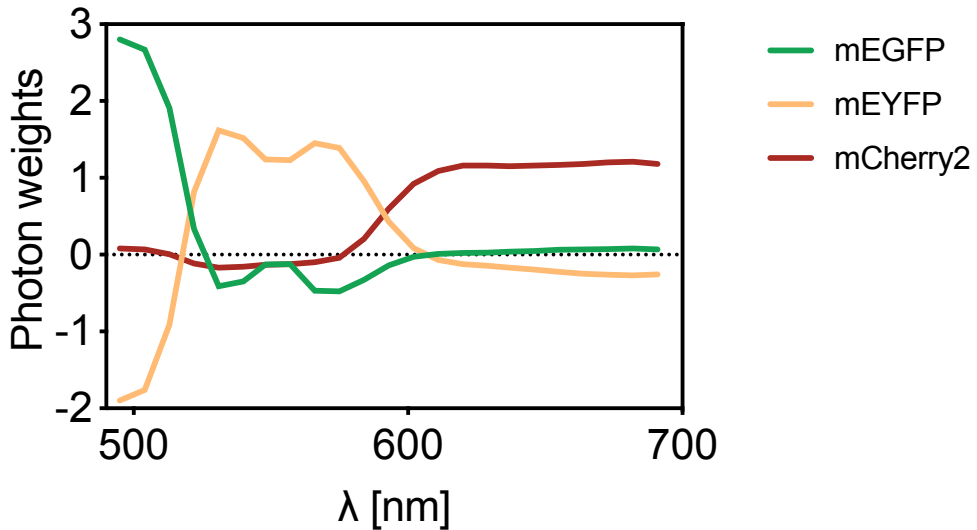

Supplement: supp [file elife-69687-supp-v1.zip]

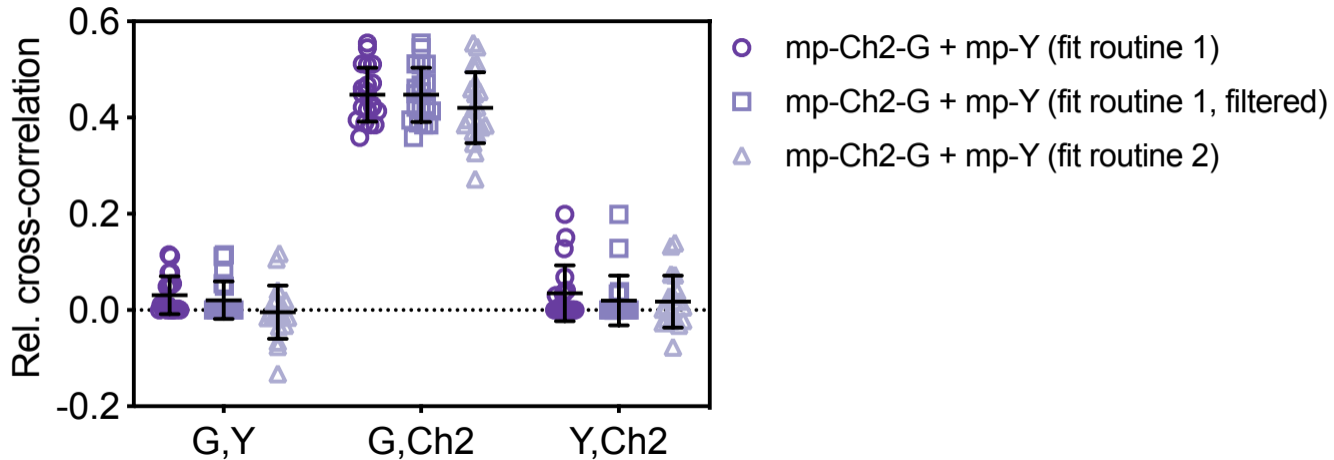

Supplement: supp [file elife-69687-supp-v1.zip]

**A**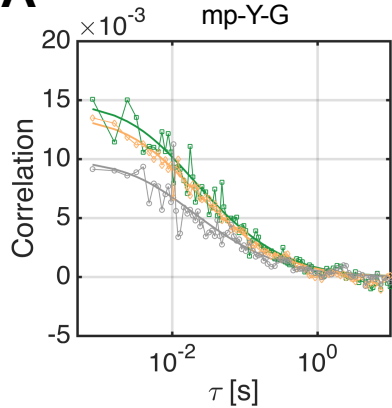**B**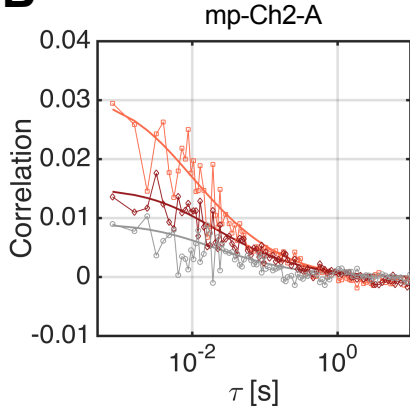**C**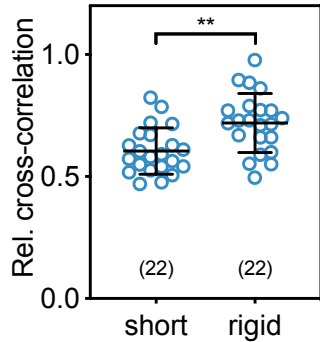

Supplement: supp [file elife-69687-supp-v1.zip]

**A**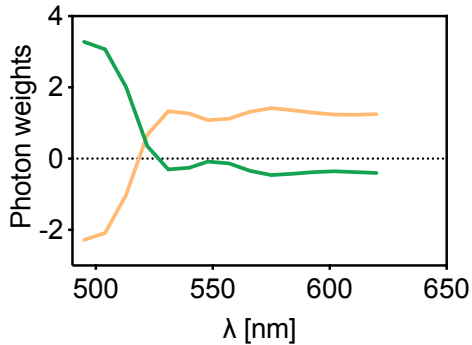**B**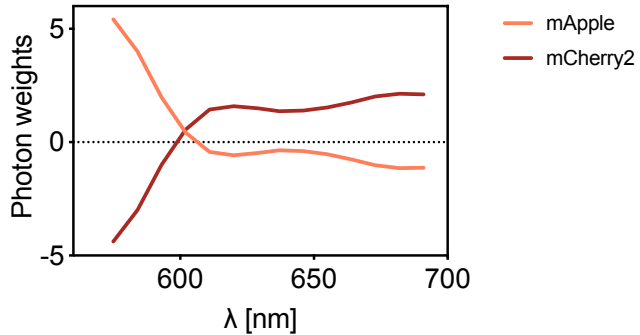

Supplement: supp [file elife-69687-supp-v1.zip]
